# Supplementary material for: Hypervalent diorganoantimony(iii) fluorides via diorganoantimony(iii) cations – a general method of synthesis
Source: Royal Society of Chemistry journal article supplement (doi:10.1039/c5ra21788a), 2015-01-01
Supplement: c5ra21788a1.pdf [file c5ra21788a1.pdf]

**Electronic Supplementary Information**

**for**

**Hypervalent Diorganoantimony(III) Fluorides *via* Diorganoantimony(III) Cations – A General Method of Synthesis**

Ana Maria Preda,<sup>†</sup> Ciprian I. Raț,<sup>†</sup> Cristian Silvestru,<sup>\*,†</sup> Heinrich Lang,<sup>§</sup> Tobias Ruffer,<sup>§</sup> and Michael Mehring<sup>\*,‡</sup>

<sup>†</sup> Departamentul de Chimie, Centrul de Chimie Supramoleculară Organică și Organometalică (CCSOOM), Facultatea de Chimie și Inginerie Chimică, Universitatea Babeș-Bolyai, 400028 Cluj-Napoca, Romania.

Fax: (+40) 264-590818, Tel: (+40) 264-593833; E-mail: [cristian.silvestru@ubbcluj.ro](mailto:cristian.silvestru@ubbcluj.ro)

<sup>§</sup> Institut für Chemie, Technische Universität Chemnitz, Anorganische Chemie, D-09111 Chemnitz, Germany.

<sup>‡</sup> Institut für Chemie, Technische Universität Chemnitz, Koordinationschemie, D-09111 Chemnitz, Germany.

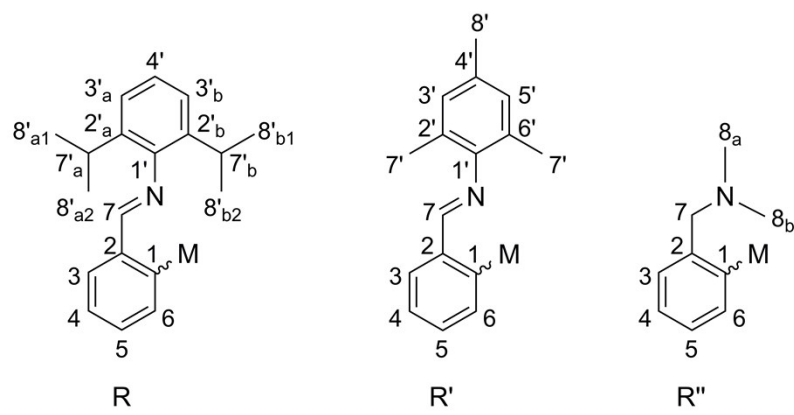

**Scheme S1.** Numbering scheme for NMR assignments.

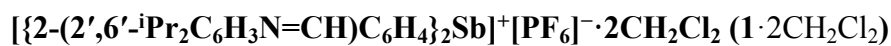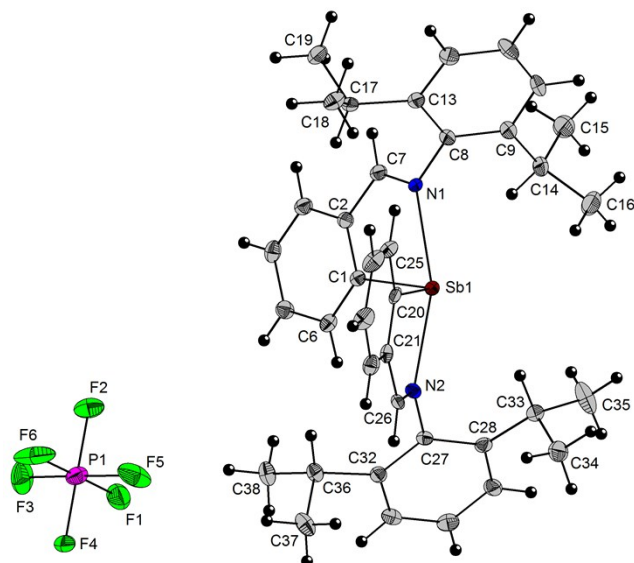

**Figure S1.** Structure of  $1 \cdot 2\text{CH}_2\text{Cl}_2$  showing the atom numbering scheme in the  $(\Lambda_{\text{Sb}})$ -cation. Displacement ellipsoids are depicted at the 30% probability level. Solvent molecules are omitted for clarity.

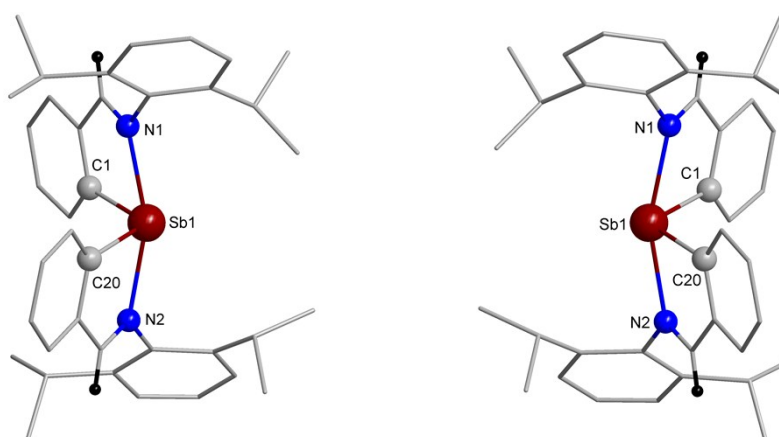

**Figure S2.** Structure of  $(\Lambda_{\text{Sb}})$ -cation (*left*) and  $(\Delta_{\text{Sb}})$ -cation (*right*) in the crystal of  $1 \cdot 2\text{CH}_2\text{Cl}_2$ .

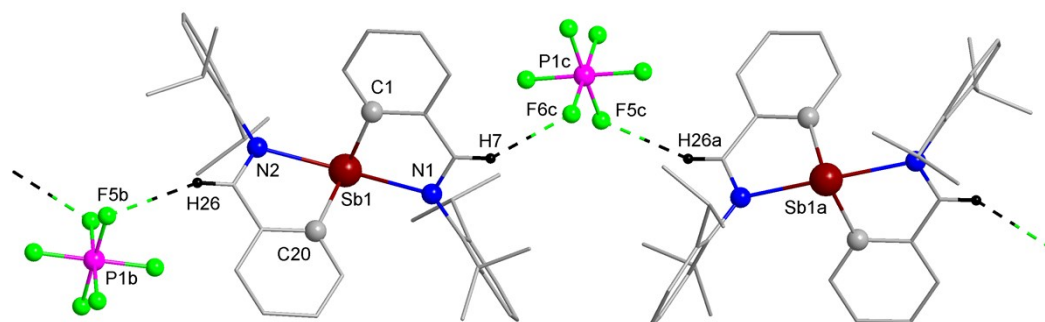

**Figure S3.** View of the chain polymer in the crystal of  $1 \cdot 2\text{CH}_2\text{Cl}_2$  based on  $\text{F} \cdots \text{H}_{\text{imine}}$  contacts between  $(\Lambda_{\text{Sb}})$ -cations and anions (only hydrogen atoms involved in cation-anion contacts are shown) [symmetry equivalent atoms  $(-x, -0.5+y, 0.5-z)$ ,  $(-x, 1-y, 1-z)$  and  $(x, 0.5-y, -0.5+z)$  are given by “a”, “b” and “c”, respectively].

|                         |                                                          |        |                                                  |
|-------------------------|----------------------------------------------------------|--------|--------------------------------------------------|
| - cation-anion distance | $\text{F}(5\text{b}) \cdots \text{H}(26)_{\text{imine}}$ | 2.48 Å | $\sum r_{\text{vdW}}(\text{F}, \text{H})$ 2.55 Å |
|                         | $\text{F}(6\text{c}) \cdots \text{H}(7)_{\text{imine}}$  | 2.38 Å |                                                  |

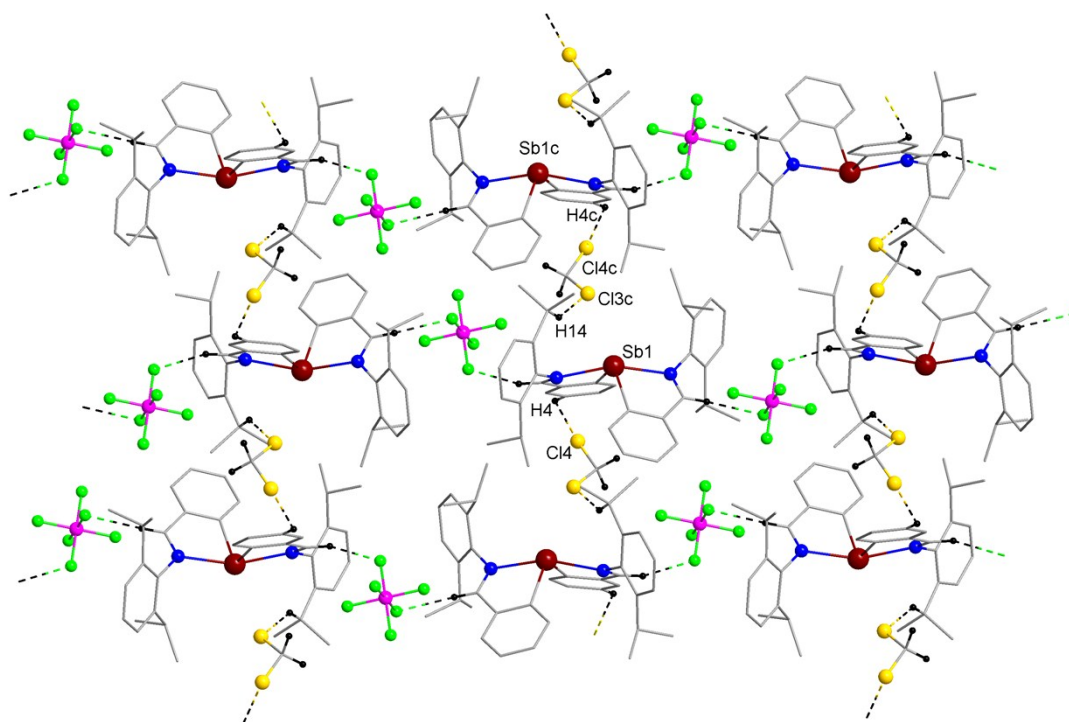

**Figure S4.** View of the layer in the crystal of  $1 \cdot 2\text{CH}_2\text{Cl}_2$  based on  $\text{Cl} \cdots \text{H}$  contacts establish by the solvent molecules between parallel chains built from  $(\Lambda_{\text{Sb}})^-$  and  $(\Delta_{\text{Sb}})^-$  cations, respectively, and anions (only hydrogen atoms involved in chlorine-hydrogen and cation-anion contacts are shown) [symmetry equivalent atoms  $(x, 0.5-y, -0.5+z)$  are given by “c”].

- cation-solvent contacts       $\text{Cl}(3\text{c}) \cdots \text{H}(14)_{\text{methine}}$        $2.85 \text{ \AA}$        $\sum r_{\text{vdW}}(\text{Cl}, \text{H}) 3.01 \text{ \AA}$   
                                           $\text{Cl}(4\text{c}) \cdots \text{H}(4\text{c})_{\text{aryl}}$        $2.87 \text{ \AA}$
- no further contacts between parallel layers.

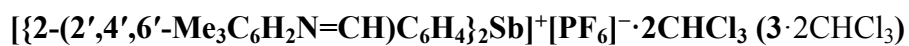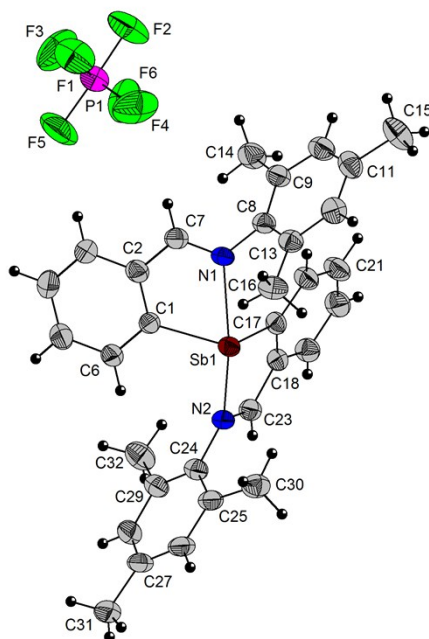

**Figure S5.** Structure of  $3 \cdot 2\text{CHCl}_3$  showing the atom numbering scheme in the  $(\Lambda_{\text{Sb}})$ -cation. Displacement ellipsoids are depicted at the 25% probability level. Solvent molecules are omitted for clarity.

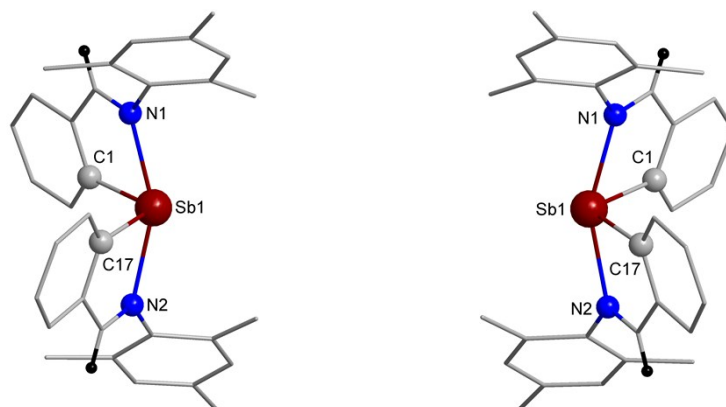

**Figure S6.** Structure of  $(\Lambda_{\text{Sb}})$ -cation (*left*) and  $(\Delta_{\text{Sb}})$ -cation (*right*) in the crystal of  $3 \cdot 2\text{CHCl}_3$ .

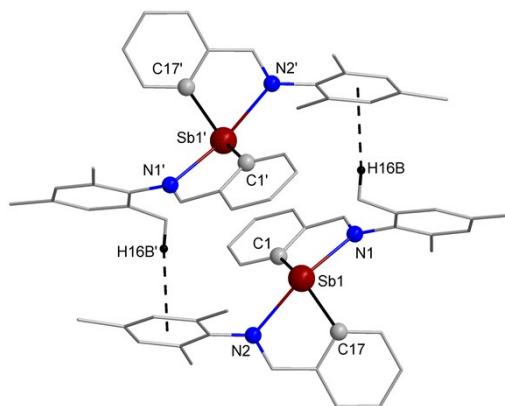

**Figure S7.** View of the dinuclear association of  $(\Lambda_{\text{Sb}})$ - and  $(\Delta_{\text{Sb}})$ -cations based on  $\text{C}-\text{H}_{\text{methyl}} \cdots \pi$  ( $\text{Ar}_{\text{centroid}}$ ) contacts in the crystal of  $3 \cdot 2\text{CHCl}_3$  (only hydrogen atoms involved in cation-cation contacts are shown) [symmetry equivalent atoms ( $I-x$ ,  $-y$ ,  $I-z$ ) are given by “prime”].

- cation-cation distance  $\text{C}(16)-\text{H}(16\text{B})_{\text{methyl}} \cdots \text{Ar}_{\text{centroid}}\{\text{C}(24')-\text{C}(29')\}$  2.85 Å ( $\gamma = 3.8^\circ$ )

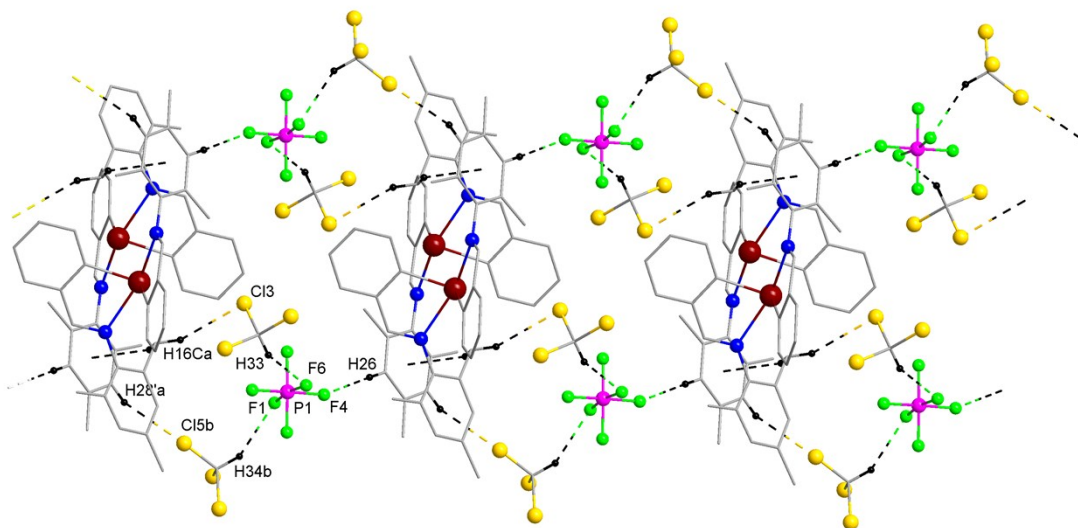

**Figure S8.** View of the chain polymer built from dimers of cations connected through anions and solvent molecules in the crystal of  $\mathbf{3} \cdot 2\text{CHCl}_3$  (only hydrogen atoms involved in cation-anion, cation-solvent and anion-solvent contacts are shown) [symmetry equivalent atoms  $(-l+x, y, z)$ ,  $(-x, -y, l-z)$  and  $(-l+x, y, z)$  are given by “a”, “prime a” and “b”, respectively].

|                           |                                   |        |                                           |
|---------------------------|-----------------------------------|--------|-------------------------------------------|
| - cation-anion distance   | F(4)···H(26) <sub>aryl</sub>      | 2.46 Å | $\sum r_{\text{vdW}}(\text{F,H})$ 2.55 Å  |
| - anion-solvent distance  | F(1)···H(34b) <sub>solvent</sub>  | 2.44 Å |                                           |
|                           | F(6)···H(33) <sub>solvent</sub>   | 2.49 Å |                                           |
| - cation-solvent distance | Cl(3)···H(16Ca) <sub>methyl</sub> | 2.94 Å | $\sum r_{\text{vdW}}(\text{Cl,H})$ 3.01 Å |
|                           | Cl(5b)···H(28'a) <sub>aryl</sub>  | 2.97 Å |                                           |

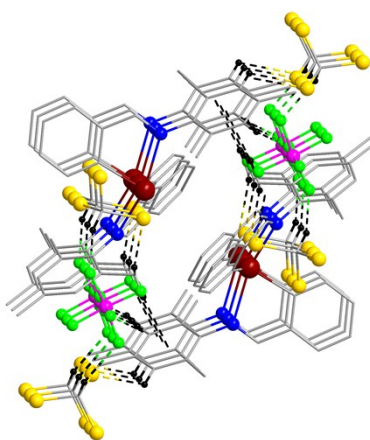

**Figure S9.** View along axis *a* of the chain polymer built from dimers of cations connected through anions and solvent molecules in the crystal of  $\mathbf{3} \cdot 2\text{CHCl}_3$ .

- no further contacts between parallel chains.

[2-(2',6'-iPr<sub>2</sub>C<sub>6</sub>H<sub>3</sub>N=CH)C<sub>6</sub>H<sub>4</sub>]<sub>2</sub>SbF (5)

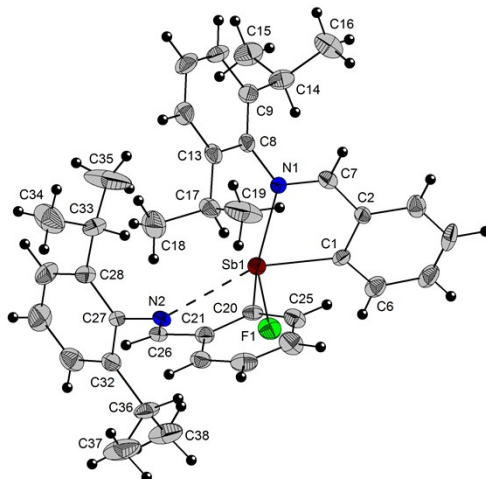

**Figure S10.** Structure of (*C*<sub>Sb</sub>)-5, showing the atom numbering scheme. Displacement ellipsoids are depicted at the 25% probability level.

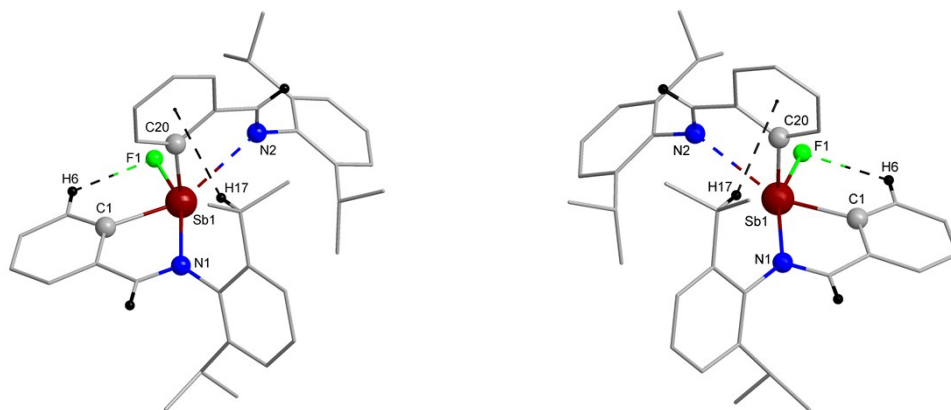

**Figure S11.** Molecular structure of (*C*<sub>Sb</sub>)-5 isomer (*left*) and (*A*<sub>Sb</sub>)-5 isomer (*right*) in the crystal of 5, showing the intramolecular F $\cdots$ H and C–H<sub>methine</sub> $\cdots$  $\pi$  (Ar<sub>centroid</sub>) contacts (only imine hydrogen atoms and hydrogen atoms involved in intramolecular contacts are shown).

- intramolecular distance
 

|                                                                              |        |                                  |
|------------------------------------------------------------------------------|--------|----------------------------------|
| F(1) $\cdots$ H(6) <sub>aryl</sub>                                           | 2.40 Å | $\sum r_{vdW}(F,H)$ 2.55 Å       |
| C(17)–H(17) <sub>methine</sub> $\cdots$ Ar <sub>centroid</sub> {C(20)–C(25)} |        | 2.77 Å ( $\gamma = 22.1^\circ$ ) |

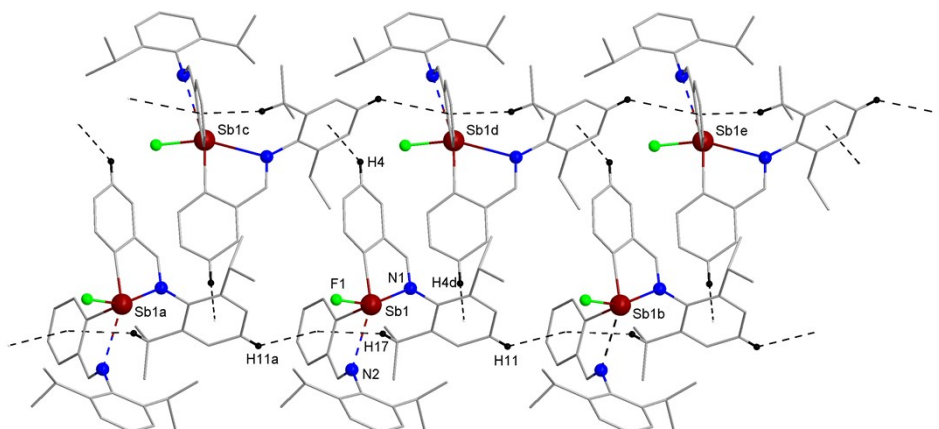

**Figure S12.** View of a ribbon-like polymer of (*C*<sub>Sb</sub>)-5 isomers based on C–H $\cdots$  $\pi$  (Ar<sub>centroid</sub>) contacts in the crystal of 5 (only hydrogen atoms involved in C–H $\cdots$  $\pi$  contacts are shown) [symmetry equivalent atoms ( $x, y, I+z$ ), ( $x, y, -I+z$ ), ( $I-x, -y, 0.5+z$ ), ( $I-x, -y, -0.5+z$ ) and ( $I-x, -y, -I.5+z$ ) are given by “a”, “b”, “c”, “d” and “e”, respectively].

- intermolecular distance
 

|                                                                             |                                  |
|-----------------------------------------------------------------------------|----------------------------------|
| C(11a)–H(11a) <sub>aryl</sub> $\cdots$ Ar <sub>centroid</sub> {C(20)–C(25)} | 2.96 Å ( $\gamma = 19.4^\circ$ ) |
| C(4)–H(4) <sub>aryl</sub> $\cdots$ Ar <sub>centroid</sub> {C(8c)–C(13c)}    | 2.82 Å ( $\gamma = 9.4^\circ$ )  |

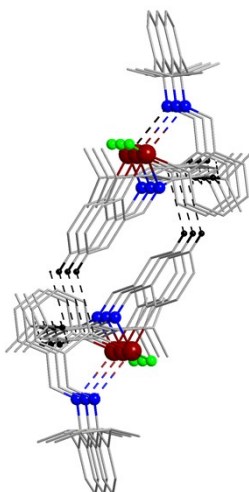

**Figure S13.** View along axis  $c$  of the ribbon-like polymer of  $(C_{sb})$ -**5** isomers in the crystal of **5**.

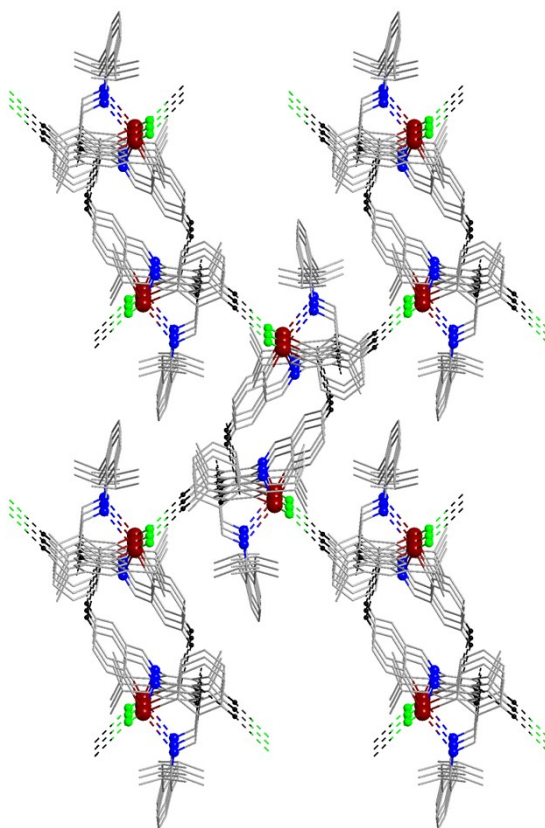

**Figure S14.** View along axis  $c$  showing the  $F \cdots H$  contacts between parallel ribbon-like polymers of  $(C_{sb})$ -**5** isomers (the central one) and four neighboring polymers of  $(A_{sb})$ -**5** isomers in the crystal of **5** [symmetry equivalent atoms  $(-0.5+x, 0.5-y, z)$  are given by “f”].

- inter-chain distance       $F(1) \cdots H(22f)_{\text{aryl}}$       2.54 Å       $\sum r_{\text{vdw}}(F,H)$  2.55 Å



[2-(2',6'-iPr<sub>2</sub>C<sub>6</sub>H<sub>3</sub>N=CH)C<sub>6</sub>H<sub>4</sub>]PhSbF (6)

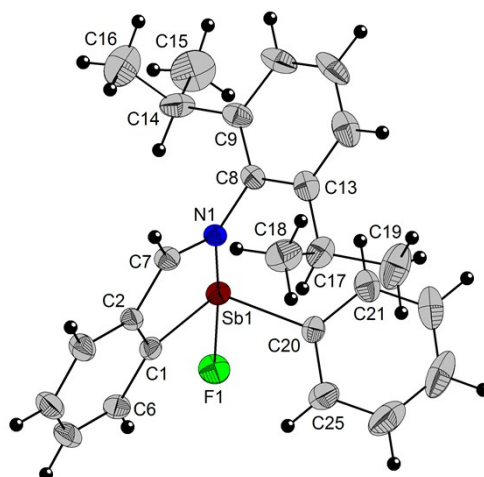

**Figure S15.** Structure of (*C*<sub>Sb</sub>)-6, showing the atom numbering scheme. Displacement ellipsoids are depicted at the 25% probability level.

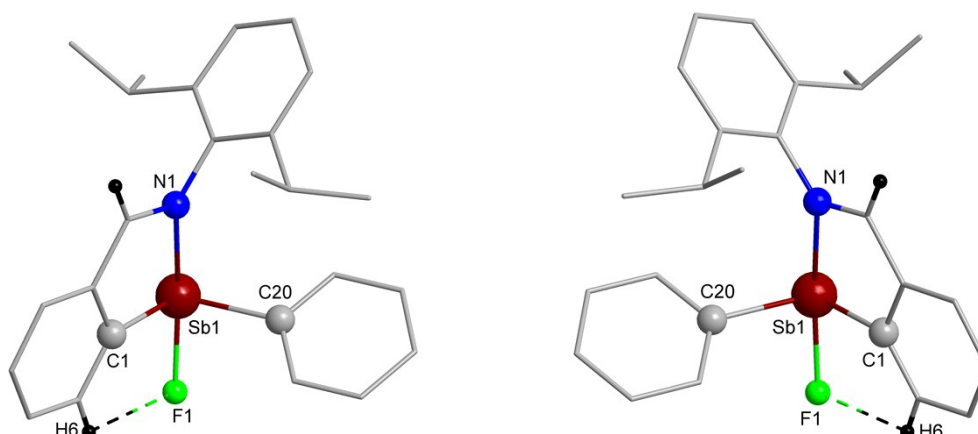

**Figure S16.** Molecular structure of (*C*<sub>Sb</sub>)-6 isomer (*left*) and (*A*<sub>Sb</sub>)-6 isomer (*right*) in the crystal of 6, showing the intramolecular fluorine-hydrogen contact (only imine hydrogen atom and the hydrogen atom involved in the intramolecular contacts are shown).

- intramolecular distance  $F(1) \cdots H(6)_{\text{aryl}}$  2.48 Å  $\sum r_{\text{vdW}}(F,H)$  2.55 Å

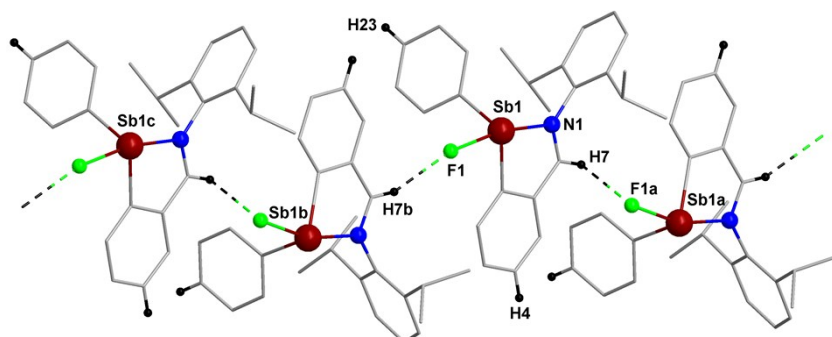

**Figure S17.** View of the chain polymer of alternating (*C*<sub>Sb</sub>)-6 and (*A*<sub>Sb</sub>)-6 isomers based on F $\cdots$ H<sub>imine</sub> contacts in the crystal of 6 (only hydrogen atoms involved in intermolecular contacts are shown) [symmetry equivalent atoms (*x*, *l*-*y*, 0.5+*z*), (*x*, *l*-*y*, -0.5+*z*) and (*x*, *y*, -*l*+*z*) are given by “a”, “b” and “c”, respectively].

- intermolecular distance  $F(1) \cdots H(7b)_{\text{imine}}$  2.31 Å  $\sum r_{\text{vdW}}(F,H)$  2.55 Å

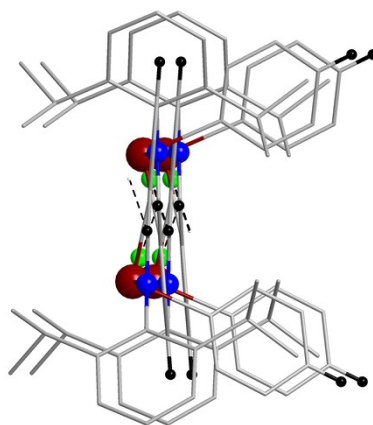

**Figure S18.** View along axis *c* of the chain polymer of alternating (*C<sub>sb</sub>*)-**6** and (*A<sub>sb</sub>*)-**6** isomers based on F $\cdots$ H<sub>imine</sub> contacts in the crystal of **6**.

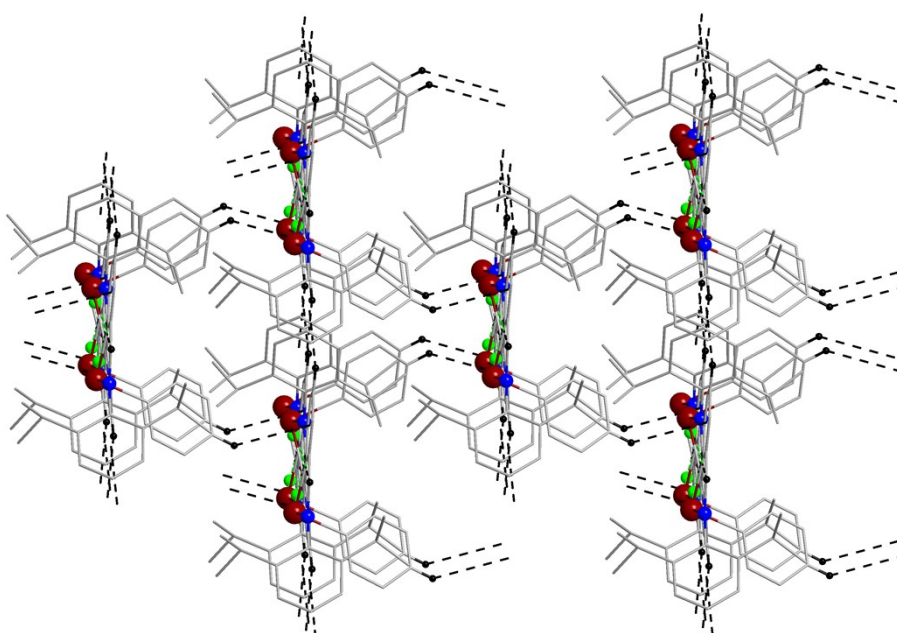

**Figure S19.** View along axis *c* of the 3D architecture based on C–H $\cdots$  $\pi$  ( $Ar_{\text{centroid}}$ ) contacts between parallel chain polymers in the crystal of **6** [symmetry equivalent atoms ( $0.5+x, 1.5-y, -0.5+z$ ), ( $-0.5+x, 0.5+y, -1+z$ ) and ( $-0.5+x, 0.5-y, -1.5+z$ ) are given by “d”, “e” and “f”, respectively].

|                        |                                                                            |                                  |
|------------------------|----------------------------------------------------------------------------|----------------------------------|
| - inter-chain distance | C(23)–H(23) <sub>aryl</sub> $\cdots$ Ar <sub>centroid</sub> {C(1d)–C(6d)}  | 2.96 Å ( $\gamma = 22.0^\circ$ ) |
|                        | C(4e)–H(4e) <sub>aryl</sub> $\cdots$ Ar <sub>centroid</sub> {C(8f)–C(13f)} | 3.07 Å ( $\gamma = 14.8^\circ$ ) |

[2-(Me<sub>2</sub>NCH<sub>2</sub>)C<sub>6</sub>H<sub>4</sub>]<sub>2</sub>SbF (7)

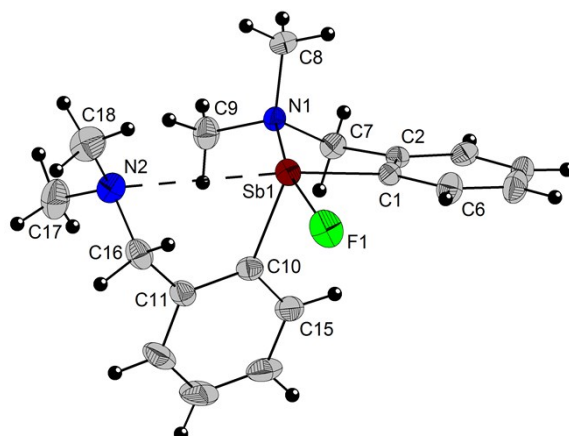

**Figure S20.** Structure of (*A*<sub>Sb</sub>)(*pS*<sub>N1</sub>,*pS*<sub>N2</sub>)-7, showing the atom numbering scheme. Displacement ellipsoids are depicted at the 25% probability level.

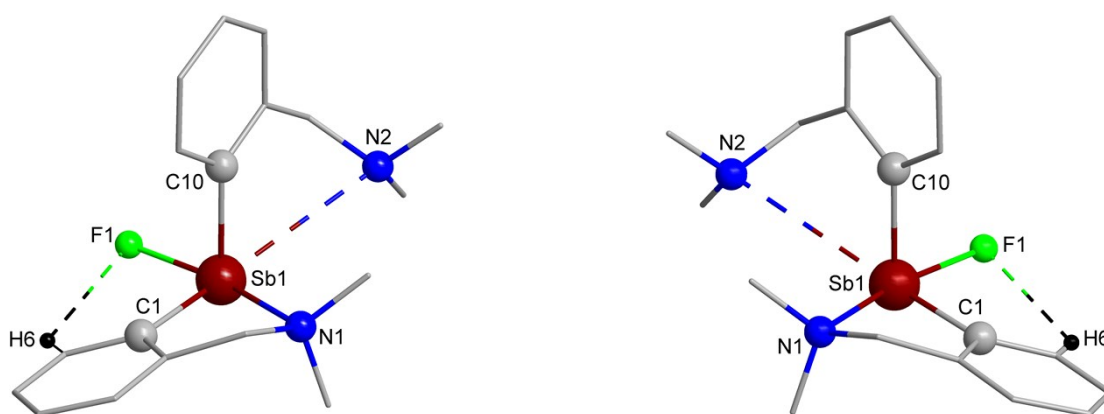

**Figure S21.** Molecular structure of (*C*<sub>Sb</sub>)(*pR*<sub>N1</sub>,*pR*<sub>N2</sub>)-7 isomer (*left*) and (*A*<sub>Sb</sub>)(*pS*<sub>N1</sub>,*pS*<sub>N2</sub>)-7 isomer (*right*) in the crystal of 7, showing the intramolecular fluorine-hydrogen contact (only the hydrogen atom involved in the intramolecular contact is shown).

- intramolecular distance                      F(1)⋯H(6)<sub>aryl</sub> 2.48 Å                      Σ*r*<sub>vdW</sub>(F,H) 2.55 Å

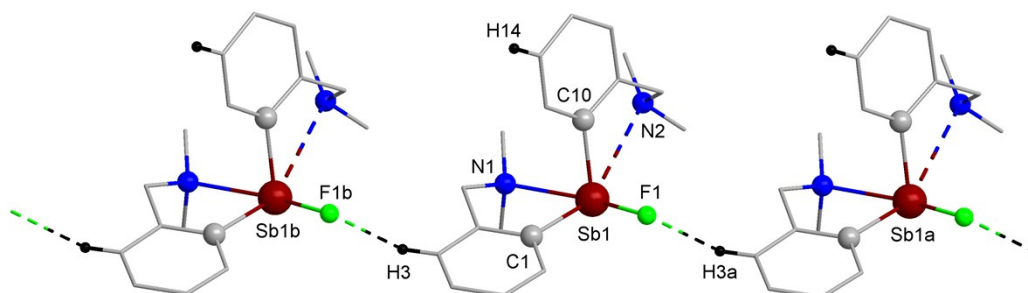

**Figure S22.** View of the chain polymer of (*A*<sub>Sb</sub>)(*pS*<sub>N1</sub>,*pS*<sub>N2</sub>)-7 isomers based on F⋯H<sub>aryl</sub> contacts in the crystal of 7 (only hydrogen atoms involved in intermolecular contacts are shown) [symmetry equivalent atoms (*x*, *l*+*y*, *z*) and (*x*, *-l*+*y*, *z*) are given by “a” and “b”, respectively].

- intermolecular distance                      F(1)⋯H(3a)<sub>aryl</sub> 2.49 Å                      Σ*r*<sub>vdW</sub>(F,H) 2.55 Å

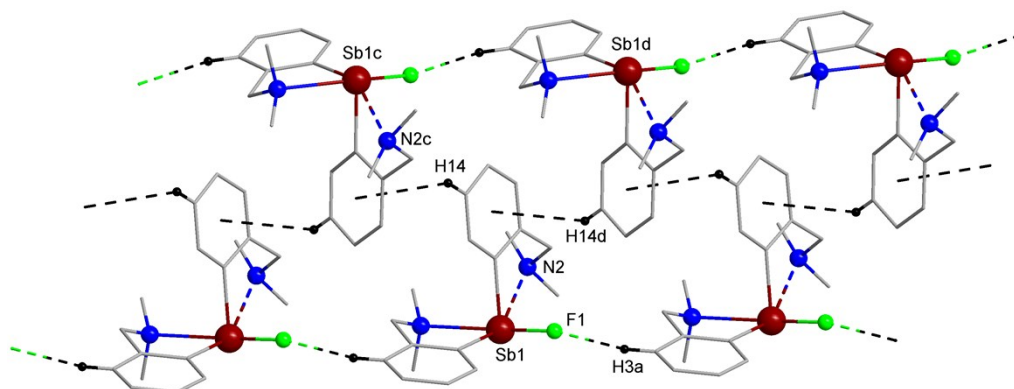

**Figure S23.** View of a pair of chain polymers of  $(A_{Sb})(pS_{N1}, pS_{N2})$ -7 isomers with inter-chain C–H $\cdots\pi$  ( $Ar_{\text{centroid}}$ ) contacts in the crystal of 7 (only hydrogen atoms involved in intermolecular contacts are shown) [symmetry equivalent atoms  $(0.5-x, -0.5+y, 0.5-z)$  and  $(0.5-x, 0.5+y, 0.5-z)$  are given by “c” and “d”, respectively].

- inter-chain distance      C(14)–H(14)<sub>aryl</sub> $\cdots$ Ar<sub>centroid</sub>{C(10c)-C(15c)}      3.09 Å ( $\gamma = 13.3^\circ$ )

- no further contacts between parallel pair of chains built from  $(C_{Sb})(pR_{N1}, pR_{N2})$ -7 and  $(A_{Sb})(pS_{N1}, pS_{N2})$ -7 isomers, respectively, developed along axis  $b$

[2-(Me<sub>2</sub>NCH<sub>2</sub>)C<sub>6</sub>H<sub>4</sub>]PhSbF (8)

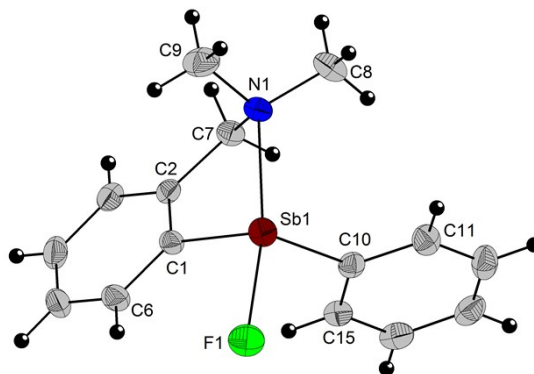

**Figure S24.** Structure of (*A*<sub>Sb</sub>)(*pR*<sub>N1</sub>)-**8**, showing the atom numbering scheme. Displacement ellipsoids are depicted at the 25% probability level.

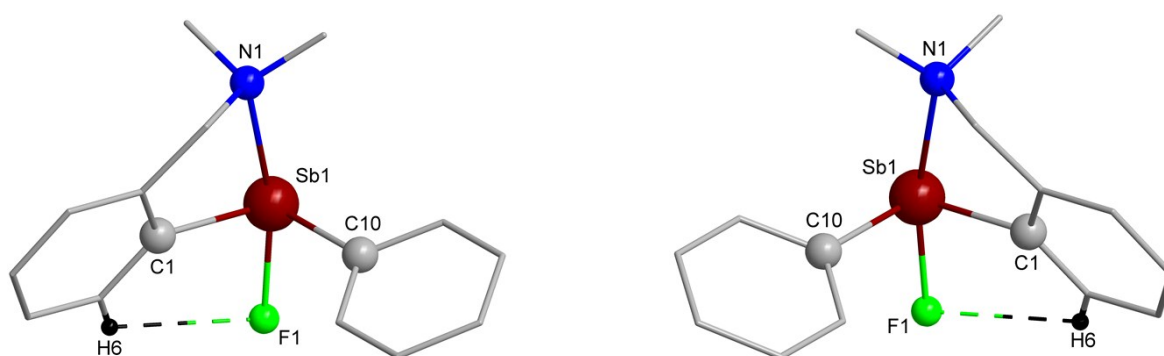

**Figure S25.** Molecular structure of (*C*<sub>Sb</sub>)(*pS*<sub>N1</sub>)-**8** isomer (*left*) and (*A*<sub>Sb</sub>)(*pR*<sub>N1</sub>)-**8** isomer (*right*) in the crystal of **8**, showing the intramolecular fluorine-hydrogen contact (only the hydrogen atom involved in the intramolecular contact is shown).

- intramolecular distance  $F(1)\cdots H(6)_{\text{aryl}}$  2.53 Å  $\sum r_{\text{vdW}}(F,H)$  2.55 Å

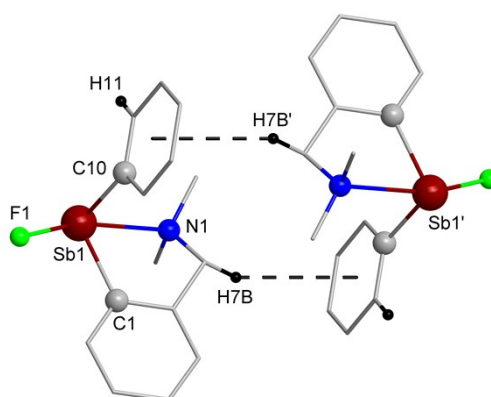

**Figure S26.** View of the dimer association of (*C*<sub>Sb</sub>)(*pS*<sub>N1</sub>)-**8** and (*A*<sub>Sb</sub>)(*pR*<sub>N1</sub>)-**8** isomers based on C–H<sub>methylene</sub>⋯π (Ar<sub>centroid</sub>) contacts in the crystal of **8** (only hydrogen atoms involved in intermolecular contacts are shown) [symmetry equivalent atoms (*l*–*x*, –*y*, 2–*z*) are given by “prime”].

- intermolecular distance  $C(7)\text{--}H(7B)_{\text{methylene}}\cdots \text{Ar}_{\text{centroid}}\{C(10')\text{--}C(15')\}$  2.99 Å ( $\gamma = 17.7^\circ$ )

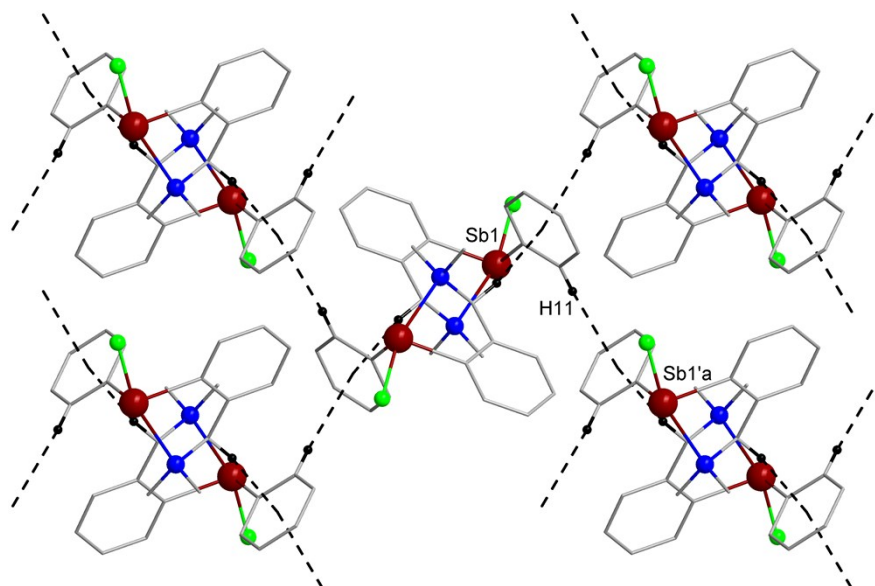

**Figure S27.** View along axis *a* of a fragment of the layer of dimers based on C–H<sub>aryl</sub>··· $\pi$  (Ar<sub>centroid</sub>) contacts in the crystal of **8** (only hydrogen atoms involved in intermolecular contacts are shown) [symmetry equivalent atoms ( $0.5-x$ ,  $-0.5+y$ ,  $1.5-z$ ) are given by “prime a”].

- intermolecular distance    C(11)–H(11)<sub>aryl</sub>···Ar<sub>centroid</sub>{C(10'a)–C(15'a)}    3.02 Å ( $\gamma = 13.7^\circ$ )

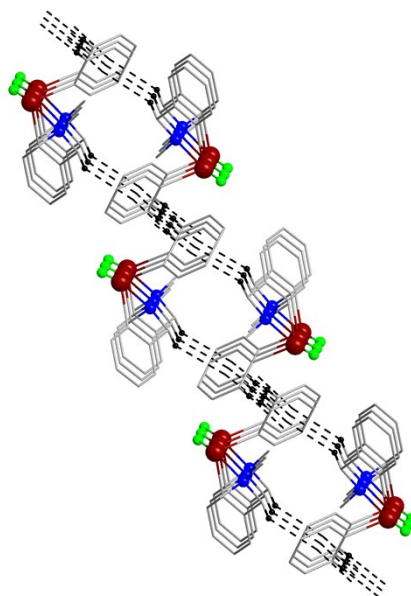

**Figure S28.** View along axis *b* of a fragment of the layer of dimers based on C–H<sub>aryl</sub>··· $\pi$  (Ar<sub>centroid</sub>) contacts in the crystal of **8** (only hydrogen atoms involved in intermolecular contacts are shown).

- no further contacts between parallel layers

**Table S1.** Crystallographic Data and Details of Data Collection and Structure Refinement Parameters for Compounds **1**·2CH<sub>2</sub>Cl<sub>2</sub> and **3**·2CHCl<sub>3</sub>

|                                                                              | <b>1</b> ·2CH <sub>2</sub> Cl <sub>2</sub>                                        | <b>3</b> ·2CHCl <sub>3</sub>                                                      |
|------------------------------------------------------------------------------|-----------------------------------------------------------------------------------|-----------------------------------------------------------------------------------|
| chemical formula                                                             | C <sub>40</sub> H <sub>48</sub> Cl <sub>4</sub> F <sub>6</sub> N <sub>2</sub> PSb | C <sub>34</sub> H <sub>34</sub> Cl <sub>6</sub> F <sub>6</sub> N <sub>2</sub> PSb |
| fw (g mol <sup>-1</sup> )                                                    | 965.32                                                                            | 950.05                                                                            |
| cryst size [mm]                                                              | 0.04x0.10x0.12                                                                    | 0.10x0.18x0.22                                                                    |
| cryst syst                                                                   | monoclinic                                                                        | triclinic                                                                         |
| space group                                                                  | <i>P</i> 2 <sub>1</sub> / <i>c</i>                                                | <i>P</i> -1                                                                       |
| <i>a</i> (Å)                                                                 | 10.3364(4)                                                                        | 12.2715(12)                                                                       |
| <i>b</i> (Å)                                                                 | 24.8372(7)                                                                        | 12.4401(9)                                                                        |
| <i>c</i> (Å)                                                                 | 16.7958(5)                                                                        | 15.1691(10)                                                                       |
| <i>α</i> (deg)                                                               | 90                                                                                | 80.778(6)                                                                         |
| <i>β</i> (deg)                                                               | 98.284(3)                                                                         | 71.653(8)                                                                         |
| <i>γ</i> (deg)                                                               | 90                                                                                | 70.246(8)                                                                         |
| <i>V</i> (Å <sup>3</sup> )                                                   | 4267.0(2)                                                                         | 2064.9(3)                                                                         |
| <i>Z</i>                                                                     | 4                                                                                 | 2                                                                                 |
| $\rho_{\text{calcd}}$ (g cm <sup>-3</sup> )                                  | 1.503                                                                             | 1.528                                                                             |
| $\mu$ (MoK $\alpha$ ) (mm <sup>-1</sup> )                                    | 0.992                                                                             |                                                                                   |
| $\mu$ (CuK $\alpha$ ) (mm <sup>-1</sup> )                                    |                                                                                   | 9.708                                                                             |
| Absorption correction                                                        | Multi-scan <sup>1</sup>                                                           | Multi-scan <sup>1</sup>                                                           |
| <i>F</i> (000)                                                               | 1960                                                                              | 948                                                                               |
| <i>T</i> (K)                                                                 | 110                                                                               | 293                                                                               |
| $\theta$ min / max (deg)                                                     | 2.9 / 25.0                                                                        | 3.1 / 62.1                                                                        |
| Reflns collected                                                             | 19369                                                                             | 11151                                                                             |
| Reflns independent                                                           | 7483                                                                              | 6479                                                                              |
| Reflns observed                                                              | 4640                                                                              | 5226                                                                              |
| <i>R</i> <sub>int</sub>                                                      | 0.052                                                                             | 0.070                                                                             |
| No. parameters                                                               | 516                                                                               | 589                                                                               |
| Goodness-of-fit on <i>F</i> <sup>2</sup>                                     | 0.84                                                                              | 0.97                                                                              |
| final <i>R</i> indices [ <i>I</i> > 2 $\sigma$ ( <i>I</i> )]                 |                                                                                   |                                                                                   |
| <i>R</i> <sub>1</sub>                                                        | 0.0375                                                                            | 0.0611                                                                            |
| <i>wR</i> <sub>2</sub>                                                       | 0.0742                                                                            | 0.1489                                                                            |
| <i>R</i> indices (all data)                                                  |                                                                                   |                                                                                   |
| <i>R</i> <sub>1</sub>                                                        | 0.0721                                                                            | 0.0698                                                                            |
| <i>wR</i> <sub>2</sub>                                                       | 0.0784                                                                            | 0.1521                                                                            |
| $\Delta\rho_{\text{min}}$ and $\Delta\rho_{\text{max}}$ (e Å <sup>-3</sup> ) | -0.56 and 0.82                                                                    | -0.80 and 0.88                                                                    |

(1) Sheldrick, G. M. *SADABS, Program for area detector adsorption correction*; University of Göttingen: Göttingen, Germany, 1996.

**Table S2.** Crystallographic Data and Details of Data Collection and Structure Refinement Parameters for Compounds **5-8**

|                                                                              | <b>5</b>                                           | <b>6</b>                             | <b>7</b>                                           | <b>8</b>                             |
|------------------------------------------------------------------------------|----------------------------------------------------|--------------------------------------|----------------------------------------------------|--------------------------------------|
| chemical formula                                                             | C <sub>38</sub> H <sub>44</sub> FN <sub>2</sub> Sb | C <sub>25</sub> H <sub>27</sub> FNSb | C <sub>18</sub> H <sub>24</sub> FN <sub>2</sub> Sb | C <sub>15</sub> H <sub>17</sub> FNSb |
| fw (g mol <sup>-1</sup> )                                                    | 669.50                                             | 482.23                               | 409.14                                             | 352.05                               |
| cryst size [mm]                                                              | 0.26x0.29x0.32                                     | 0.25x0.29x0.32                       | 0.22x0.26x0.30                                     | 0.29x0.29x0.45                       |
| cryst syst                                                                   | orthorhombic                                       | monoclinic                           | monoclinic                                         | monoclinic                           |
| space group                                                                  | <i>Pna</i> 2 <sub>1</sub>                          | <i>Cc</i>                            | <i>P</i> 2 <sub>1</sub> / <i>n</i>                 | <i>P</i> 2 <sub>1</sub> / <i>n</i>   |
| <i>a</i> (Å)                                                                 | 14.847(11)                                         | 15.136(2)                            | 9.1371(8)                                          | 11.3139(8)                           |
| <i>b</i> (Å)                                                                 | 21.755(16)                                         | 10.038(2)                            | 8.0760(7)                                          | 8.1198(6)                            |
| <i>c</i> (Å)                                                                 | 10.693(8)                                          | 15.178(3)                            | 24.949(2)                                          | 15.8500(12)                          |
| $\alpha$ (deg)                                                               | 90                                                 | 90                                   | 90                                                 | 90                                   |
| $\beta$ (deg)                                                                | 90                                                 | 100.706(4)                           | 95.549(2)                                          | 101.487(1)                           |
| $\gamma$ (deg)                                                               | 90                                                 | 90                                   | 90                                                 | 90                                   |
| <i>V</i> (Å <sup>3</sup> )                                                   | 3454(4)                                            | 2265.9(7)                            | 1832.4(3)                                          | 1426.92(18)                          |
| <i>Z</i>                                                                     | 4                                                  | 4                                    | 4                                                  | 4                                    |
| $\rho_{\text{calcd}}$ (g cm <sup>-3</sup> )                                  | 1.288                                              | 1.414                                | 1.483                                              | 1.639                                |
| $\mu$ (MoK $\alpha$ ) (mm <sup>-1</sup> )                                    | 0.831                                              | 1.235                                | 1.513                                              | 1.927                                |
| Absorption correction                                                        | Multi-scan <sup>1</sup>                            | Multi-scan <sup>1</sup>              | Multi-scan <sup>1</sup>                            | Multi-scan <sup>1</sup>              |
| <i>F</i> (000)                                                               | 1384                                               | 976                                  | 824                                                | 696                                  |
| <i>T</i> (K)                                                                 | 297                                                | 297                                  | 297                                                | 297                                  |
| $\theta$ min / max (deg)                                                     | 1.7 / 25.0                                         | 2.5 / 25.0                           | 1.6 / 25.0                                         | 2.0 / 25.0                           |
| Reflns collected                                                             | 21151                                              | 10576                                | 16818                                              | 13223                                |
| Reflns independent                                                           | 6049                                               | 3944                                 | 3223                                               | 2516                                 |
| Reflns observed                                                              | 5253                                               | 3879                                 | 2982                                               | 2387                                 |
| <i>R</i> <sub>int</sub>                                                      | 0.050                                              | 0.023                                | 0.034                                              | 0.026                                |
| No. parameters                                                               | 387                                                | 257                                  | 203                                                | 165                                  |
| Goodness-of-fit on <i>F</i> <sup>2</sup>                                     | 1.08                                               | 1.08                                 | 1.25                                               | 1.15                                 |
| final <i>R</i> indices [ <i>I</i> > 2 $\sigma$ ( <i>I</i> )]                 |                                                    |                                      |                                                    |                                      |
| <i>R</i> <sub>1</sub>                                                        | 0.0476                                             | 0.0215                               | 0.0630                                             | 0.0281                               |
| <i>wR</i> <sub>2</sub>                                                       | 0.1028                                             | 0.0499                               | 0.1085                                             | 0.0633                               |
| <i>R</i> indices (all data)                                                  |                                                    |                                      |                                                    |                                      |
| <i>R</i> <sub>1</sub>                                                        | 0.0577                                             | 0.0220                               | 0.0698                                             | 0.0302                               |
| <i>wR</i> <sub>2</sub>                                                       | 0.1078                                             | 0.0501                               | 0.1115                                             | 0.0645                               |
| Flack                                                                        | 0.017(15)                                          | -0.006(18)                           | -                                                  | -                                    |
| $\Delta\rho_{\text{min}}$ and $\Delta\rho_{\text{max}}$ (e Å <sup>-3</sup> ) | -0.80 and 1.09                                     | -0.34 and 0.56                       | -0.55 and 0.84                                     | -0.56 and 0.51                       |

(1) Sheldrick, G. M. *SADABS, Program for area detector adsorption correction*; University of Göttingen: Göttingen, Germany, 1996.
